# Supplementary material
Source: HighWire-hosted journal article supplement (http://www.ajnr.org/highwire/filestream/92106/field_highwire_adjunct_files/0/0080.pdf)
Supplement: 0080.pdf [file 0080.pdf]

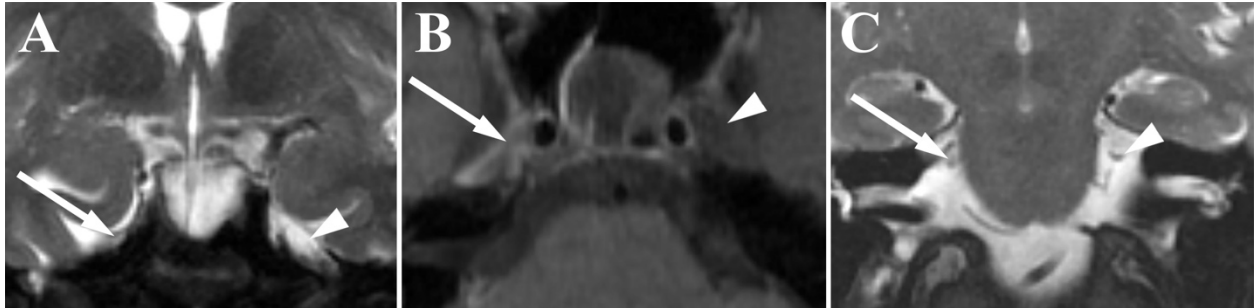

Supplemental Figure 1. (A) Coronal T2- and (B) postcontrast axial T1-weighted images in Patient 1 showing absence of Meckel's cave (arrow) compared to the normal side (arrowhead). (C) Coronal T2-weighted image shows atrophy of the trigeminal nerve ipsilateral to the side of collapse (arrow) compared to the normal contralateral nerve (arrowhead).

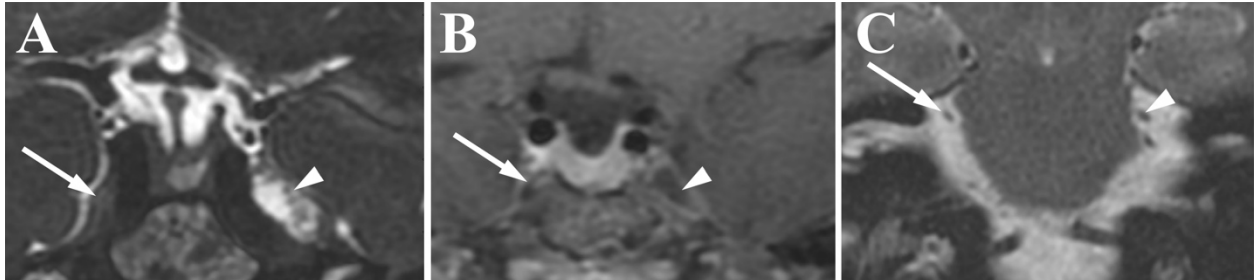

Supplemental Figure 3. (A) Coronal CISS and (B) postcontrast coronal T1-weighted images in Patient 2 showing absence of Meckel's cave (arrow) compared to the normal side (arrowhead). (C) Coronal CISS image shows atrophy of the trigeminal nerve ipsilateral to the side of collapse (arrow) compared to the normal contralateral nerve (arrowhead).

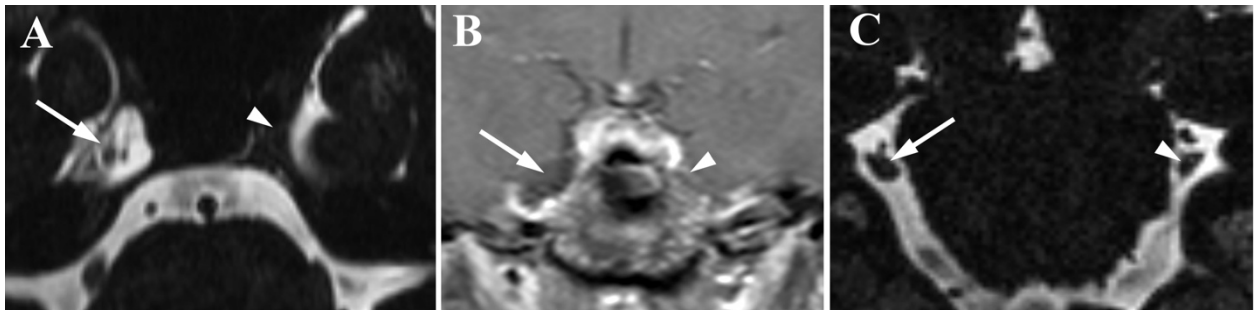

Supplemental Figure 3. (A) Axial T2-SPACE and (B) postcontrast coronal T1-weighted images in Patient 3 showing absence of Meckel's cave (arrow) compared to the normal side (arrowhead). (C) Coronal T2-SPACE image shows atrophy of the trigeminal nerve ipsilateral to the side of collapse (arrow) compared to the normal contralateral nerve (arrowhead).

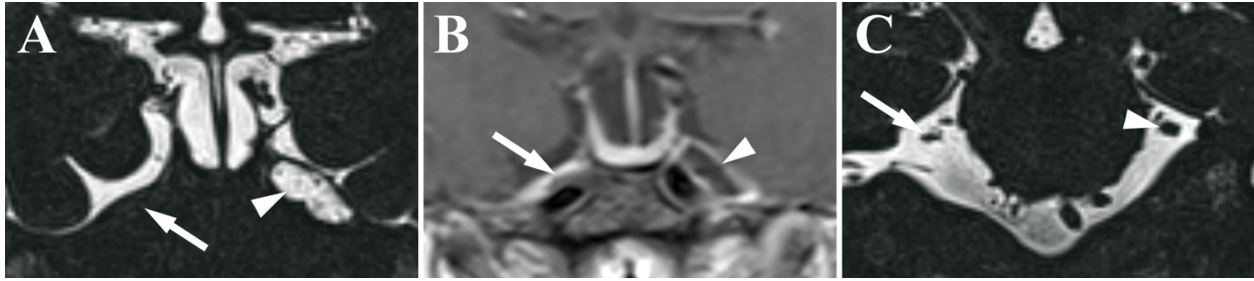

Supplemental Figure 4. (A) Coronal T2-SPACE and (B) postcontrast coronal T1-weighted images in Patient 4 showing absence of Meckel's cave (arrow) compared to the normal side (arrowhead). (C) Coronal T2-SPACE image shows atrophy of the trigeminal nerve ipsilateral to the side of collapse (arrow) compared to the normal contralateral nerve (arrowhead).

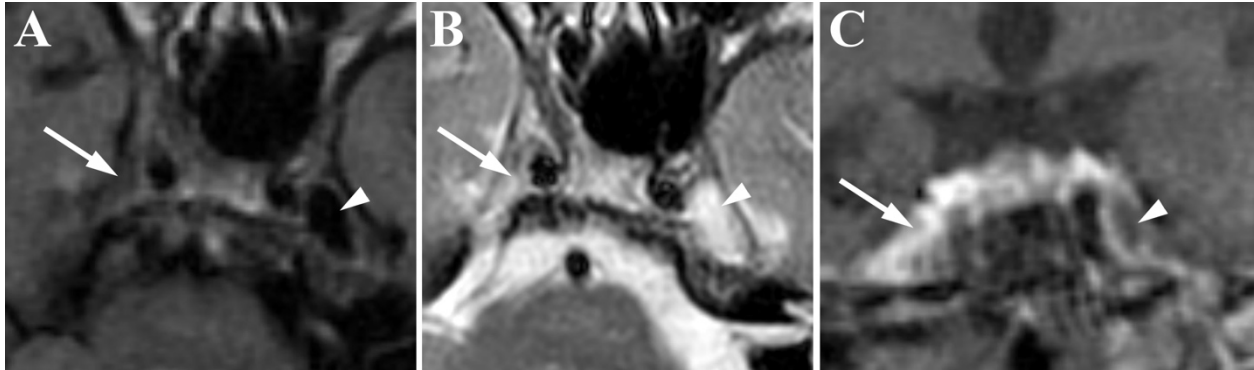

Supplemental Figure 5. (A) Noncontrast Axial T1-, (B) axial T2-, and (C) postcontrast coronal T1-weighted images in Patient 5 showing absence of Meckel's cave (arrow) compared to the normal side (arrowhead).

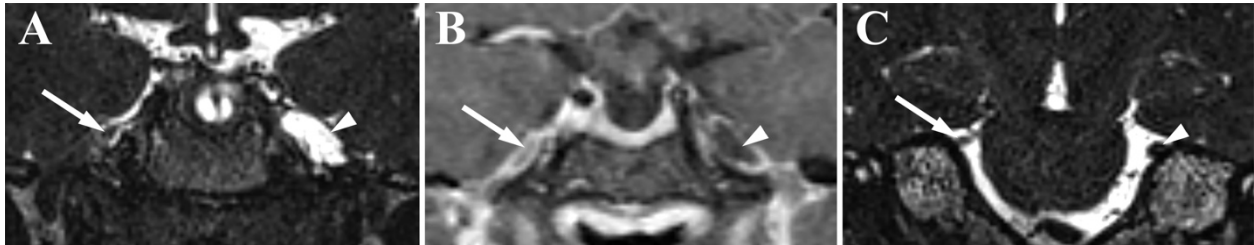

Supplemental Figure 6. (A) Coronal T2-SPACE and (B) postcontrast coronal T1-weighted images in Patient 6 showing absence of Meckel's cave (arrow) compared to the normal side (arrowhead). (C) Coronal T2-SPACE image shows atrophy of the trigeminal nerve ipsilateral to the side of collapse (arrow) compared to the normal contralateral nerve (arrowhead).

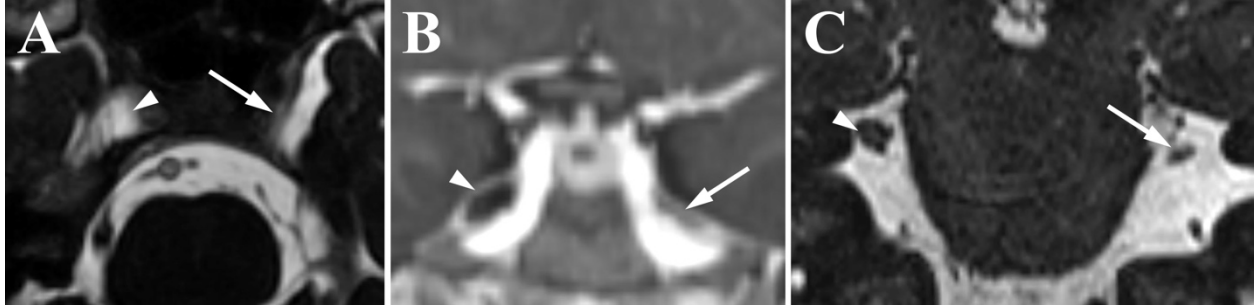

Supplemental Figure 7. (A) Axial CISS and (B) postcontrast coronal T1-weighted images in Patient 7 showing absence of Meckel's cave (arrow) compared to the normal side (arrowhead). (C) Coronal CISS image shows atrophy of the trigeminal nerve ipsilateral to the side of collapse (arrow) compared to the normal contralateral nerve (arrowhead).

**Supplemental Table 1.** Summary of patient information.

| Patient | Age | TN  | Age at TN Diagnosis | Side of TN | Additional Relevant Conditions    | Side of Absent Meckel's | Atrophy of CN V (Side) | Medical Treatment                                                        | Response to Medical Treatment       | Intervention 1            | Response to Intervention 1                  | Intervention 2      | Response to Intervention 2     |
|---------|-----|-----|---------------------|------------|-----------------------------------|-------------------------|------------------------|--------------------------------------------------------------------------|-------------------------------------|---------------------------|---------------------------------------------|---------------------|--------------------------------|
| 1       | 79  | Yes | 49                  | Right      | Abnormal elevation of CRP and ESR | Right                   | Yes (Right)            | Carbamazepine, gabapentin                                                | Initial improvement with recurrence | MVD                       | Initial mild improvement with recurrence    | Balloon Compression | Adequate response to treatment |
| 2       | 61  | Yes | 36                  | Right      |                                   | Right                   | Yes (Right)            | Carbamazepine                                                            | Initial improvement with recurrence | MVD                       | Initial improvement with recurrence         | GK                  | No post-procedure follow up    |
| 3       | 41  | Yes | 39                  | Left       |                                   | Left                    | Yes (Left)             | Carbamazepine, gabapentin                                                | Improved                            |                           |                                             |                     |                                |
| 4       | 42  | Yes | 42                  | Right      | Intracranial Hypertension         | Right                   | Yes (Right)            | Carbamazepine                                                            | Initial improvement with recurrence | Stereotactic Radiosurgery | Adequate response to treatment              |                     |                                |
| 5       | 94  | Yes | 80                  | Right      |                                   | Right                   | Yes (Right)            | Carbamazepine, gabapentin, Carbamol, Trileptal,                          | No response                         | Rhizotomy                 | Initial improvement with symptom recurrence |                     |                                |
| 6       | 42  | Yes | 40                  | Right      | Intracranial Hypertension         | Right                   | Yes (Right)            | Carbamazepine, gabapentin, tramadol, topiramate, lycrica                 | No response                         |                           |                                             |                     |                                |
| 7       | 43  | Yes | 40                  | Left       |                                   | Left                    | Yes (Left)             | Carbamazepine, oxcarbazepine, phentermine, diazepam, hydrochlorothiazide | No follow up                        |                           |                                             |                     |                                |

**Supplemental Table 2.** Individual scan data and CN V measurements.

| Patient                                                                                                     | Sequence   | Side of Absent Meckel's Cave | Ipsilateral CN V Cross Section (mm) | Contralateral CN V Cross Section (mm) | Ipsilateral CN V Area (mm <sup>2</sup> ) | Contralateral CN V Area (mm <sup>2</sup> ) | Scanner                   |
|-------------------------------------------------------------------------------------------------------------|------------|------------------------------|-------------------------------------|---------------------------------------|------------------------------------------|--------------------------------------------|---------------------------|
| 1                                                                                                           | Cor T2     | R                            | 2.1 x 1.5                           | 3.0 x 2.1                             | 3.8                                      | 6.4                                        | GE Signa 1.5T             |
| 2                                                                                                           | CISS       | R                            | 1.5 x 2.1                           | 3.4 x 2.6                             | 2.6                                      | 4.9                                        | GE Signa 1.5T             |
| 3                                                                                                           | T2 SPACE   | L                            | 2.3 x 1.9                           | 2.9 x 2.4                             | 4.9                                      | 7.3                                        | Siemens Skyra 3T          |
| 4                                                                                                           | T2 SPACE   | R                            | 2.7 x 1.3                           | 2.6 x 2.3                             | 3.1                                      | 4.8                                        | Siemens Vida 3T           |
| 5                                                                                                           | No Coronal | R                            | --                                  | --                                    | --                                       | --                                         | GE Signa 1.5T             |
| 6                                                                                                           | T2 SPACE   | R                            | 2.2 x 2.0                           | 2.4 x 3.1                             | 4.7                                      | 6.5                                        | Siemens Skyra 3T          |
| 7                                                                                                           | CISS       | L                            | 2.1 x 2.1                           | 3.3 x 2.7                             | 4.5                                      | 8.7                                        | Siemens Skyra 3T          |
| <b>Mean and SD cross-sectional area of the cisternal segment of trigeminal nerve near in mm<sup>2</sup></b> |            |                              |                                     |                                       | <b>3.9 ± 0.9</b>                         | <b>6.4 ± 1.5</b>                           | <b>P value &lt;0.001*</b> |

\* P value was calculated using paired t-test
